# Supplementary material for: Venous versus capillary sampling for total creatine kinase assay: Effects of a simulated football match
Source: PubMed Central journal article supplement (PMC6147722; doi:10.1371/journal.pone.0204238), 2018-09-20
Supplement: pone.0204238.s001.pdf [file pone.0204238.s001.pdf]

|             | Pre              |              |             |              |
|-------------|------------------|--------------|-------------|--------------|
|             | antecubital vein | ear lobule   | Chance      | mean         |
| J13         | 120,00           | 336,92       | 216,92      | 228,46       |
| J17         | 100,51           | 143,59       | 43,08       | 122,05       |
| J19         | 41,31            | 55,08        | 13,77       | 48,20        |
| J2          | 133,89           | 83,37        | -50,53      | 108,63       |
| J21         | 119,08           | 177,71       | 58,63       | 148,40       |
| J22         | 98,93            | 263,82       | 164,89      | 181,37       |
| J24         | 36,92            | 123,08       | 86,15       | 80,00        |
| J7          | 111,04           | 161,19       | 50,15       | 136,12       |
| J10         | 143,28           | 250,75       | 107,46      | 197,01       |
| J14         | 204,18           | 297,31       | 93,13       | 250,75       |
| J15         | 75,22            | 10,75        | -64,48      | 42,99        |
| J20         | 85,16            | 170,32       | 85,16       | 127,74       |
| J23         | 188,70           | 287,63       | 98,93       | 238,17       |
| J3          | 60,00            | 57,39        | -2,61       | 58,70        |
| J4          | 111,16           | 103,58       | -7,58       | 107,37       |
| J5          | 80,84            | 123,79       | 42,95       | 102,32       |
| J6          | 322,39           | 308,06       | -14,33      | 315,22       |
| <b>Mean</b> | <b>119,6</b>     | <b>173,8</b> | <b>54,2</b> | <b>146,7</b> |
| <b>DP</b>   | <b>68,9</b>      | <b>100,1</b> | <b>73,2</b> | <b>DP</b>    |
| SEM         | 16,7             | 24,3         |             | SEM          |
| Variance    | 4745             | 10024        | 146,4379    | 200,66       |
|             |                  |              |             | -92,22       |

Results

Dia 1

**Lin Coeficient**  
**0,77345013**

*Statistics*

|             |                   |
|-------------|-------------------|
| R multiplo  | <b>0,68207195</b> |
| R-square    | 0,465222145       |
| R-square aj | 0,429570288       |
| Error       | 52,0284362        |
| N           | 17                |

145,3451

ANOVA

|            | gl | SQ          | MQ       | F          | F of significance  |
|------------|----|-------------|----------|------------|--------------------|
| Regression | 1  | 35323,17786 | 35323,18 | 13,0490298 | <b>0,002560033</b> |
| Residue    | 15 | 40604,3726  | 2706,958 |            |                    |
| Total      | 16 | 75927,55046 |          |            |                    |

|     | Dia 1      |            |        |        |  |
|-----|------------|------------|--------|--------|--|
|     | antecubita | ear lobule | Chance | mean   |  |
| J13 | 120,00     | 336,92     | 216,92 | 228,46 |  |
| J17 | 100,51     | 143,59     | 43,08  | 122,05 |  |
| J19 | 41,31      | 55,08      | 13,77  | 48,20  |  |
| J2  | 133,89     | 83,37      | -50,53 | 108,63 |  |
| J21 | 119,08     | 177,71     | 58,63  | 148,40 |  |
| J22 | 98,93      | 263,82     | 164,89 | 181,37 |  |
| J24 | 36,92      | 123,08     | 86,15  | 80,00  |  |
| J7  | 111,04     | 161,19     | 50,15  | 136,12 |  |
| J10 | 143,28     | 250,75     | 107,46 | 197,01 |  |
| J14 | 204,18     | 297,31     | 93,13  | 250,75 |  |
| J15 | 75,22      | 10,75      | -64,48 | 42,99  |  |
| J20 | 85,16      | 170,32     | 85,16  | 127,74 |  |
| J23 | 188,70     | 287,63     | 98,93  | 238,17 |  |
| J3  | 60,00      | 57,39      | -2,61  | 58,70  |  |
| J4  | 111,16     | 103,58     | -7,58  | 107,37 |  |
| J5  | 80,84      | 123,79     | 42,95  | 102,32 |  |
| J6  | 322,39     | 308,06     | -14,33 | 315,22 |  |
|     | 212,31     | 350,77     | 138,46 | 281,54 |  |
|     | 164,50     | 525,00     | 360,50 | 344,75 |  |
|     | 340,33     | 293,11     | -47,21 | 316,72 |  |
|     | 232,42     | 333,47     | 101,05 | 282,95 |  |
|     | 381,07     | 608,24     | 227,18 | 494,66 |  |
|     | 137,40     | 252,82     | 115,42 | 195,11 |  |
|     | 254,36     | 508,72     | 254,36 | 381,54 |  |
|     | 376,12     | 616,12     | 240,00 | 496,12 |  |
|     | 343,88     | 616,12     | 272,24 | 480,00 |  |
|     | 809,55     | 1097,31    | 287,76 | 953,43 |  |
|     | 411,94     | 673,43     | 261,49 | 542,69 |  |
|     | 166,45     | 387,10     | 220,65 | 276,77 |  |
|     | 390,23     | 791,45     | 401,22 | 590,84 |  |
|     | 224,35     | 266,09     | 41,74  | 245,22 |  |
|     | 492,63     | 553,26     | 60,63  | 522,95 |  |
|     | 323,37     | 462,32     | 138,95 | 392,84 |  |
|     | 368,96     | 512,24     | 143,28 | 440,60 |  |
|     | 180,00     | 290,77     | 110,77 | 235,39 |  |
|     | 164,10     | 334,36     | 170,26 | 249,23 |  |
|     | 171,15     | 179,02     | 7,87   | 175,09 |  |
|     | 174,32     | 277,89     | 103,57 | 226,11 |  |
|     | 133,74     | 364,58     | 230,84 | 249,16 |  |
|     | 120,00     | 218,02     | 98,02  | 169,01 |  |
|     | 106,67     | 334,36     | 227,69 | 220,52 |  |
|     | 146,87     | 358,21     | 211,34 | 252,54 |  |
|     | 150,45     | 272,84     | 122,39 | 211,65 |  |
|     | 214,93     | 333,13     | 118,20 | 274,03 |  |
|     | 558,81     | 601,79     | 42,98  | 580,30 |  |
|     | 207,76     | 343,88     | 136,12 | 275,82 |  |
|     | 141,29     | 247,74     | 106,45 | 194,52 |  |

|        |        |        |        |
|--------|--------|--------|--------|
| 120,92 | 549,62 | 428,70 | 335,27 |
| 88,70  | 200,87 | 112,17 | 144,79 |
| 275,37 | 495,16 | 219,79 | 385,27 |
| 204,63 | 267,79 | 63,16  | 236,21 |

Mean      **212,20**      **342,59**      **130,39**      **277,39**

21208,1      42707,49827      111,22

222,440583      352,83

-92,05

130,39

1,614452586

161,4452586

**Lin**  
**0,796703601**

| 24h          |              |              |              |
|--------------|--------------|--------------|--------------|
| antecubital  | ear lobule   | Chance       | mean         |
| 212,31       | 350,77       | 138,46       | 281,54       |
| 164,50       | 525,00       | 360,50       | 344,75       |
| 340,33       | 293,11       | -47,21       | 316,72       |
| 232,42       | 333,47       | 101,05       | 282,95       |
| 381,07       | 608,24       | 227,18       | 494,66       |
| 137,40       | 252,82       | 115,42       | 195,11       |
| 254,36       | 508,72       | 254,36       | 381,54       |
| 376,12       | 616,12       | 240,00       | 496,12       |
| 343,88       | 616,12       | 272,24       | 480,00       |
| 809,55       | 1097,31      | 287,76       | 953,43       |
| 411,94       | 673,43       | 261,49       | 542,69       |
| 166,45       | 387,10       | 220,65       | 276,77       |
| 390,23       | 791,45       | 401,22       | 590,84       |
| 224,35       | 266,09       | 41,74        | 245,22       |
| 492,63       | 553,26       | 60,63        | 522,95       |
| 323,37       | 462,32       | 138,95       | 392,84       |
| 368,96       | 512,24       | 143,28       | 440,60       |
| <b>331,2</b> | <b>520,4</b> | <b>189,3</b> | <b>425,8</b> |

**159,1                      213,6                      117,3**

38,6                      51,8

25301                      45616

234,5085829

423,79

-45,23

Results

**Lin Coeficient**

**0,84832**

|          |
|----------|
| Mean     |
| DP       |
| SEM      |
| Variance |

*Statistics*

|             |                    |             |
|-------------|--------------------|-------------|
| R multiple  | <b>0,841390655</b> |             |
| R-square    | 0,707938235        | 157,1544102 |
| R-square aj | 0,68846745         |             |
| Error       | 88,78178131        |             |
| N           | 17                 |             |

ANOVA

|            | <i>gl</i> | <i>SQ</i>   | <i>MQ</i> | <i>F</i> | <i>= of significance</i> |
|------------|-----------|-------------|-----------|----------|--------------------------|
| Regression | 1         | 286589,0751 | 286589,1  | 36,359   | 2,30513E-05              |
| Residue    | 15        | 118233,0704 | 7882,205  |          |                          |
| Total      | 16        | 404822,1455 |           |          |                          |

|  |  |
|--|--|
|  |  |
|  |  |

Results

| <i>Statistics</i> |                 |
|-------------------|-----------------|
| R multiple        | <b>0,856365</b> |
| R-square          | 0,733361        |
| R-square adjusted | 0,72792         |
| Error             | 75,9625         |
| N                 | 51              |

ANOVA

|            | <i>gl</i> | <i>SQ</i> | <i>MQ</i>   | <i>F</i> | <i>p of significance</i> |
|------------|-----------|-----------|-------------|----------|--------------------------|
| Regression | 1         | 777660    | 777660,0328 | 134,7694 | <b>1,13249E-15</b>       |
| Residue    | 49        | 282744,8  | 5770,301878 |          |                          |

Total 50 1060405

|              | <i>Coefficientes</i> | <i>Erro padrão</i> | <i>Stat t</i> | <i>valor-P</i> | <i>95% inferiores</i> |
|--------------|----------------------|--------------------|---------------|----------------|-----------------------|
| intersection | 5,458111             | 20,74355           | 0,263123301   | 0,793559       | -36,2276108           |
| Variável X 1 | 0,603473             | 0,051983           | 11,60902169   | 1,13E-15       | 0,499009014           |

| 48h          |              |              |              |
|--------------|--------------|--------------|--------------|
| antecubital  | ear lobule   | Chance       | mean         |
| 180,00       | 290,77       | 110,77       | 235,39       |
| 164,10       | 334,36       | 170,26       | 249,23       |
| 171,15       | 179,02       | 7,87         | 175,09       |
| 174,32       | 277,89       | 103,57       | 226,11       |
| 133,74       | 364,58       | 230,84       | 249,16       |
| 120,00       | 218,02       | 98,02        | 169,01       |
| 106,67       | 334,36       | 227,69       | 220,52       |
| 146,87       | 358,21       | 211,34       | 252,54       |
| 150,45       | 272,84       | 122,39       | 211,65       |
| 214,93       | 333,13       | 118,20       | 274,03       |
| 558,81       | 601,79       | 42,98        | 580,30       |
| 207,76       | 343,88       | 136,12       | 275,82       |
| 141,29       | 247,74       | 106,45       | 194,52       |
| 120,92       | 549,62       | 428,70       | 335,27       |
| 88,70        | 200,87       | 112,17       | 144,79       |
| 275,37       | 495,16       | 219,79       | 385,27       |
| 204,63       | 267,79       | 63,16        | 236,21       |
| <b>185,9</b> | <b>333,5</b> | <b>147,7</b> | <b>259,7</b> |

106,5      117,7      96,9

25,8      28,5

11336      13848      193,7018      341,37

-46,04

Results

**Lin Coeficient**  
**0,98024**

Statistics

|              |                 |          |
|--------------|-----------------|----------|
| R multiple   | <b>0,630687</b> |          |
| R-square     | 0,397766        | 179,4478 |
| R-square adj | 0,357617        |          |
| Error        | 85,33616        |          |
| N            | 17              |          |

ANOVA

|            | gl | SQ       | MQ       | F        | df significance |
|------------|----|----------|----------|----------|-----------------|
| Regression | 1  | 72147,14 | 72147,14 | 9,907245 | <b>0,006639</b> |
| Residue    | 15 | 109233,9 | 7282,261 |          |                 |
| Total      | 16 | 181381,1 |          |          |                 |





| <i>% superior</i> | <i>inferior 95,0%</i> | <i>superior 95,0%</i> |
|-------------------|-----------------------|-----------------------|
| 47,14383          | -36,2276              | 47,14383              |
| 0,707937          | 0,499009              | 0,707937              |
